# Supplementary material for: Evolutionary origin of highly repetitive plastid genomes within the clover genus (Trifolium)
Source: PubMed Central journal article supplement (PMC4241210; doi:10.1186/s12862-014-0228-6), 2014-11-18

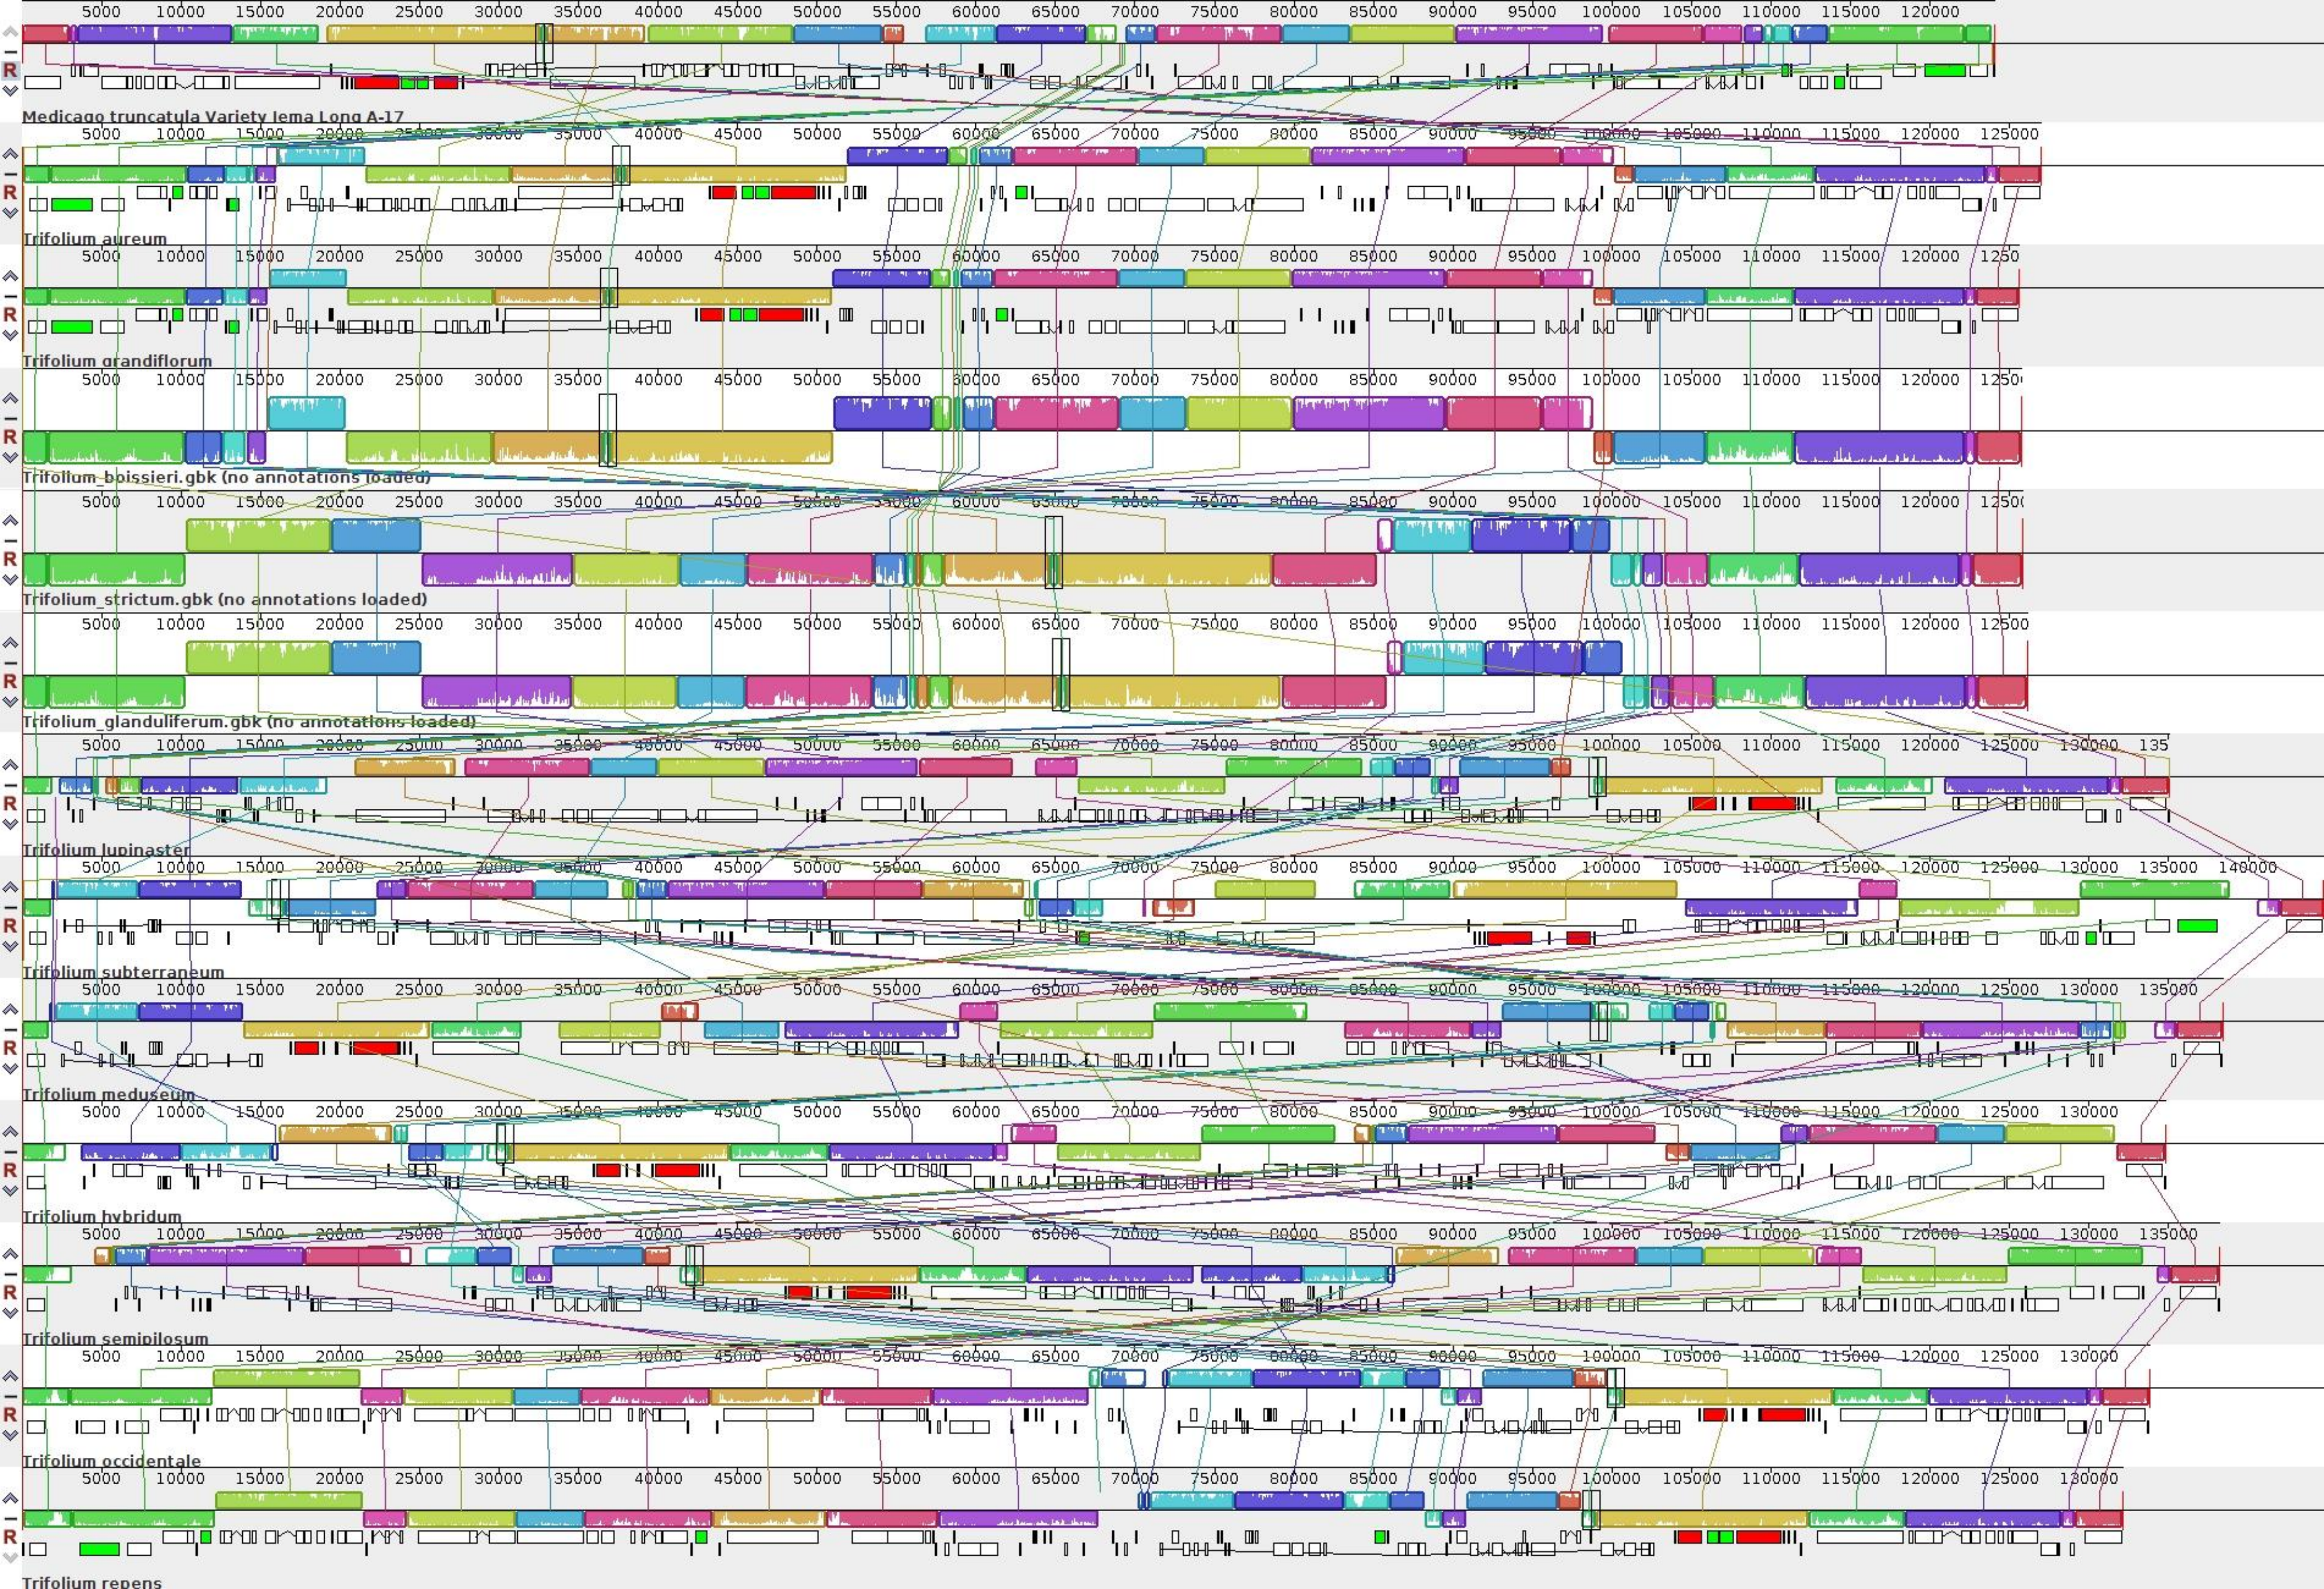

Supplement: 12862_2014_228_MOESM1_ESM.pdf [file 12862_2014_228_MOESM1_ESM.pdf]
